# Supplementary material for: Early-life gut microbiome modulation reduces the abundance of antibiotic-resistant bacteria
Source: Antimicrob Resist Infect Control. 2019 Aug 14;8:131. doi: 10.1186/s13756-019-0583-6 (PMC6693174; doi:10.1186/s13756-019-0583-6)
Supplement: Supplementary file 5 — Table S6. Kruskal-Wallis test with post-hoc corrections for every ARG identified according to treatment status. (XLSX 51 kb) [file 13756_2019_583_MOESM5_ESM.xlsx]

## Sheet: 2019_ARG_all_raw_count_Kruskal.
NCBI ID	CARD ID	Gene Name	P-value	P-value (FDR)	P-value(Bonferroni)
AAC75733.1	ARO:3000074	emrB	2.03e-07	0.000108133	0.000132264
NP_415632.1	ARO:3003844	mfd	4.35e-07	0.000108133	0.000283889
AAC60781.1	ARO:3003048	rosA	5.16e-07	0.000108133	0.00033636
BAE77933.1	ARO:3000518	CRP	9.94e-07	0.000108133	0.000648336
AAC76093.1	ARO:3002986	bacA	1.46e-06	0.000108133	0.000952924
NP_312864.1	ARO:3000830	cpxA	1.74e-06	0.000108133	0.00113631
ANK04473.1	ARO:3004055	Escherichia coli CpxR	1.78e-06	0.000108133	0.00116279
NP_417169.1	ARO:3000516	emrR	1.83e-06	0.000108133	0.00119239
BAA16547.1	ARO:3000027	emrA	1.91e-06	0.000108133	0.00124335
NP_414618.4	ARO:3003843	leuO	1.98e-06	0.000108133	0.001288
AAC75136.1	ARO:3000793	mdtB	2.02e-06	0.000108133	0.00131643
AAC74149.2	ARO:3001216	mdtH	2.05e-06	0.000108133	0.00133512
YP_489321.1	ARO:3001329	mdtG	2.53e-06	0.000108133	0.00165071
NP_414995.1	ARO:3000216	acrB	2.72e-06	0.000108133	0.00177164
YP_490697.1	ARO:3000491	acrD	2.72e-06	0.000108133	0.0017728
AAC75315.1	ARO:3002985	arnA	2.73e-06	0.000108133	0.00177852
NP_309766.1	ARO:3000676	H-NS	3.04e-06	0.000108133	0.00197999
NP_416715.1	ARO:3003952	YojI	3.26e-06	0.000108133	0.00212877
BAB38442	ARO:3004126	Escherichia coli LamB	3.39e-06	0.000108133	0.0022135
NP_415434.1	ARO:3003950	msbA	3.46e-06	0.000108133	0.00225524
NP_415222.1	ARO:3003841	kdpE	3.53e-06	0.000108133	0.00230066
AAC75314.1	ARO:3003578	PmrF	3.65e-06	0.000108133	0.00237893
EFF04178.1	ARO:3000309	emrD	3.96e-06	0.000110614	0.00258223
AAC75137.1	ARO:3000794	mdtC	4.07e-06	0.000110614	0.00265473
NP_416292.1	ARO:3002818	msrB	4.26e-06	0.000110981	0.00277452
NP_414996.1	ARO:3004043	Escherichia coli acrA	4.44e-06	0.000111162	0.002893
YP_490321.1	ARO:3000828	baeR	4.6e-06	0.000111162	0.00300138
AAC75135.2	ARO:3000792	mdtA	5.05e-06	0.000117683	0.00329513
ACN32294.1	ARO:3000237	tolC	5.3e-06	0.000119159	0.00345561
AAC60780.1	ARO:3003049	rosB	6.87e-06	0.000149225	0.00447676
AFH35853.1	ARO:3001328	mdfA	7.39e-06	0.000155432	0.00481838
AAA74437.1	ARO:3000378	MexB	8.22e-06	0.000167567	0.00536216
AAC76733.1	ARO:3001215	mdtL	9.75e-06	0.000191858	0.00635742
AML99881.1	ARO:3001327	mdtK	1e-05	0.000191858	0.00652318
NP_417544.5	ARO:3000024	patA	1.11e-05	0.000207079	0.00724777
NP_460903.1	ARO:3000826	sdiA	1.17e-05	0.000212027	0.00763298
BAA15934.1	ARO:3000829	baeS	1.29e-05	0.000226753	0.00838985
AAC76298.1	ARO:3000502	acrF	1.33e-05	0.000228329	0.0086765
AFK13827.1	ARO:3004108	Enterobacter cloacae rob	2.28e-05	0.000381182	0.0148661
YP_489794.1	ARO:3000263	marA	2.82e-05	0.000459201	0.018368
NP_418813.1	ARO:3004109	Escherichia coli rob	3.19e-05	0.000508069	0.0208308
AAC76539.1	ARO:3000796	mdtF	3.66e-05	0.000568589	0.0238807
CAA09666	ARO:3004122	Klebsiella pneumoniae OmpK37	7.99e-05	0.00121202	0.0521169
AAV85982.1	ARO:3000535	macB	0.00010737	0.00154906	0.0700055
Q0SSM7	ARO:3003773	Clostridium perfringens mprF	0.000109289	0.00154906	0.0712567
AAA20116.1	ARO:3000180	tetA(P)	0.000109289	0.00154906	0.0712567
AAC75089.1	ARO:3003577	PmrE	0.000111769	0.00155049	0.0728731
AAC76297.1	ARO:3000499	acrE	0.000158001	0.00214618	0.103017
BAC76072.1	ARO:3001856	CFE-1	0.000225712	0.00300335	0.147164
BAE78116.1	ARO:3003576	PmrC	0.000246407	0.00321315	0.160657
ABG77965.1	ARO:3004042	Enterobacter cloacae acrA	0.000843388	0.0107821	0.549889
BAE78084.1	ARO:3003548	mdtN	0.000869997	0.0109084	0.567238
AAD51345.1	ARO:3003052	smeB	0.000917658	0.0112889	0.598313
BAB59035.1	ARO:3002870	tet34	0.00093548	0.0112951	0.609933
AAV80464.1	ARO:3000565	tet(38)	0.00105014	0.0124489	0.684688
CAC41008.1	ARO:3004041	Klebsiella pneumoniae acrA	0.00125466	0.0146078	0.818038
YP_007349693.1	ARO:3002533	AAC(3)-IIa	0.301179	0.378094	1
AKN19287.1	ARO:3002578	AAC(6')-Ib7	0.680804	0.724118	1
YP_009062819.1	ARO:3002579	AAC(6')-Ib8	0.333442	0.378094	1
AAA26549.1	ARO:3002549	AAC(6')-Ic	0.167779	0.32269	1
NP_863643.1	ARO:3002597	AAC(6')-Ie-APH(2'')-Ia	0.775665	0.813076	1
AAB63533.1	ARO:3002556	AAC(6')-Ii	0.207521	0.378094	1
CAE50925.1	ARO:3002589	AAC(6')-Iid	0.301179	0.378094	1
AAK63041.1	ARO:3002559	AAC(6')-Ip	0.333442	0.378094	1
AAU10334.1	ARO:3002628	aad(6)	0.94935	0.970182	1
ACJ47200.1	ARO:3002612	aadA12	0.943122	0.967718	1
ABD58917.1	ARO:3002615	aadA15	0.981026	0.985561	1
ACK43806.1	ARO:3002617	aadA17	0.981026	0.985561	1
AAF27727.1	ARO:3002602	aadA2	0.301179	0.378094	1
CAK12750.1	ARO:3002619	aadA22	0.333442	0.378094	1
CAH10847.1	ARO:3002620	aadA23	0.333442	0.378094	1
ABG72894.1	ARO:3002621	aadA24	0.333442	0.378094	1
AET15272.1	ARO:3003197	aadA25	0.301179	0.378094	1
AAC14728.1	ARO:3002603	aadA3	0.301179	0.378094	1
AAN34365.1	ARO:3002604	aadA4	0.301179	0.378094	1
AAF17880.1	ARO:3002605	aadA5	0.301179	0.378094	1
BAD89844.2	ARO:3000753	abeM	0.167779	0.32269	1
YP_002325052.1	ARO:3000768	abeS	0.333442	0.378094	1
AAC76296.1	ARO:3000656	acrS	0.0577942	0.254659	1
AAC45086.2	ARO:3001821	ACT-1	0.333442	0.378094	1
AFU25650.1	ARO:3001834	ACT-12	0.0964076	0.275887	1
AFU25647.1	ARO:3001836	ACT-14	0.624435	0.672945	1
AFU25653.1	ARO:3001837	ACT-15	0.301179	0.378094	1
BAM34463.1	ARO:3001827	ACT-16	0.333442	0.378094	1
AHM76771.1	ARO:3001838	ACT-17	0.962058	0.980096	1
AHM76777.1	ARO:3001839	ACT-18	0.943122	0.967718	1
AHA80105.1	ARO:3001841	ACT-20	0.333442	0.378094	1
AHA80106.1	ARO:3001842	ACT-21	0.943122	0.967718	1
AHM76774.1	ARO:3001843	ACT-22	0.167779	0.32269	1
AGU38146.1	ARO:3001828	ACT-23	0.981026	0.985561	1
AHL39336.1	ARO:3001844	ACT-24	0.981026	0.985561	1
AHL39338.1	ARO:3001845	ACT-25	0.333442	0.378094	1
AHL39340.1	ARO:3001847	ACT-27	0.962058	0.980096	1
AHL39333.1	ARO:3001848	ACT-28	0.699621	0.739307	1
AIT76096.1	ARO:3001851	ACT-31	0.333442	0.378094	1
AIT76088.1	ARO:3001852	ACT-32	0.301179	0.378094	1
AIT76087.1	ARO:3001853	ACT-33	0.943122	0.967718	1
AJG06170.1	ARO:3003171	ACT-36	0.301179	0.378094	1
AJG06172.1	ARO:3003172	ACT-37	0.981026	0.985561	1
ACJ05689.1	ARO:3001824	ACT-5	0.943122	0.967718	1
ACJ05686.1	ARO:3001825	ACT-6	0.301179	0.378094	1
AEI70575.1	ARO:3001826	ACT-9	0.0884025	0.258559	1
WP_004746565.1	ARO:3003848	ADC-2	0.333442	0.378094	1
YP_002325610.1	ARO:3000774	adeA	0.333442	0.378094	1
YP_002325611.1	ARO:3000775	adeB	0.0884335	0.258559	1
YP_001706894.1	ARO:3000777	adeF	0.333442	0.378094	1
YP_001706893.1	ARO:3000778	adeG	0.333442	0.378094	1
YP_001713101.1	ARO:3000779	adeH	0.333442	0.378094	1
YP_002320475.1	ARO:3000780	adeI	0.333442	0.378094	1
AAX14802.1	ARO:3000781	adeJ	0.0364198	0.199544	1
AAX14803.1	ARO:3000782	adeK	0.333442	0.378094	1
ALH22601.1	ARO:3000620	adeL	0.333442	0.378094	1
ADM92605.1	ARO:3000553	adeR	0.333442	0.378094	1
ENU37733	ARO:3004091	ANT(3'')-IIc	0.301179	0.378094	1
YP_006938491.1	ARO:3003905	ANT(4')-Ib	0.747168	0.784466	1
YP_008997281.1	ARO:3002626	ANT(6)-Ia	0.689893	0.730972	1
CBH51824.1	ARO:3002629	ANT(6)-Ib	0.301179	0.378094	1
AFU35063.1	ARO:3002630	ANT(9)-Ia	0.333442	0.378094	1
AAK63040.1	ARO:3002635	APH(2'')-IIa	0.333442	0.378094	1
ABK33456.1	ARO:3002639	APH(3'')-Ib	0.599835	0.650736	1
CAE51638.1	ARO:3002641	APH(3')-Ia	1	1	1
AGV10830.1	ARO:3002647	APH(3')-IIIa	0.918476	0.958154	1
AAC23556.1	ARO:3002660	APH(6)-Id	0.945454	0.967718	1
YP_001332362.1	ARO:3000838	arlR	0.00423731	0.0406283	1
YP_499945.1	ARO:3000839	arlS	0.00396609	0.0385953	1
NP_252244	ARO:3002985	arnA	0.00695069	0.0604247	1
AAA99504.1	ARO:3002987	bcrA	0.301179	0.378094	1
BAC11901.1	ARO:3002670	cat	0.251807	0.378094	1
AAA23018.1	ARO:3002670	cat	0.301179	0.378094	1
NP_052167.1	ARO:3002670	cat	0.301179	0.378094	1
CAC84275.1	ARO:3002670	cat	0.301179	0.378094	1
AAA26615.1	ARO:3002670	cat	0.333442	0.378094	1
CAA63498.1	ARO:3002670	cat	0.624435	0.672945	1
CAA43218.1	ARO:3002670	cat	0.943122	0.967718	1
AAB53259.1	ARO:3002671	cat-TC	0.138304	0.32269	1
AAF66228.1	ARO:3002682	catD	0.301179	0.378094	1
CAA23899.1	ARO:3002683	catI	0.981026	0.985561	1
CAA52904.1	ARO:3002688	catS	0.301179	0.378094	1
ACT97415.1	ARO:3002999	CblA-1	0.282545	0.378094	1
CAE00499.1	ARO:3003835	cdeA	0.0472479	0.21848	1
AAB58161.1	ARO:3003010	ceoB	0.167718	0.32269	1
AAA21532.1	ARO:3003559	cepA beta-lactamase	0.00293056	0.0323852	1
AAD23513.1	ARO:3003002	CfxA2	0.00386025	0.0381346	1
AAL79549.2	ARO:3003003	CfxA3	0.057806	0.254659	1
AAV37205.1	ARO:3003005	CfxA4	0.333442	0.378094	1
ACT97371.1	ARO:3003097	CfxA6	0.570061	0.623665	1
AAG03380.1	ARO:3002703	cmx	0.333442	0.378094	1
AHA80101.1	ARO:3002112	CMY-100	0.0471822	0.21848	1
AHA80102.1	ARO:3002113	CMY-101	0.0275122	0.16016	1
AHA80103.1	ARO:3002114	CMY-102	0.123278	0.32269	1
AHA80104.1	ARO:3002115	CMY-103	0.0125229	0.0972018	1
AGR82311.1	ARO:3002116	CMY-104	0.0884335	0.258559	1
AHL39330.1	ARO:3002117	CMY-105	0.00706463	0.0604347	1
AGZ20169.1	ARO:3002120	CMY-108	0.167779	0.32269	1
BAO05497.1	ARO:3002071	CMY-110	0.0884025	0.258559	1
AHW47897.1	ARO:3002122	CMY-111	0.0184084	0.130459	1
AIT76090.1	ARO:3002123	CMY-112	0.0252586	0.149767	1
AIT76089.1	ARO:3002124	CMY-113	0.0884335	0.258559	1
AIT76099.1	ARO:3002125	CMY-114	0.333442	0.378094	1
AIT76092.1	ARO:3002126	CMY-115	0.167779	0.32269	1
AIT76093.1	ARO:3002127	CMY-116	0.237491	0.378094	1
AIT76097.1	ARO:3002128	CMY-117	0.0884335	0.258559	1
AIT76091.1	ARO:3002129	CMY-118	0.0884335	0.258559	1
AIT76098.1	ARO:3002130	CMY-119	0.0252321	0.149767	1
CAA76382.1	ARO:3002023	CMY-12	0.167718	0.32269	1
AAQ16660.2	ARO:3002024	CMY-13	0.981026	0.985561	1
CAD88479.1	ARO:3002025	CMY-14	0.333442	0.378094	1
CAD88477.1	ARO:3002026	CMY-15	0.333442	0.378094	1
CAH03679.1	ARO:3002027	CMY-16	0.333442	0.378094	1
AAS13399.1	ARO:3002028	CMY-17	0.167779	0.32269	1
CAA62957.1	ARO:3002013	CMY-2	0.333442	0.378094	1
AAX58682.2	ARO:3002031	CMY-20	0.167718	0.32269	1
AAZ66866.1	ARO:3002032	CMY-21	0.00713722	0.0604347	1
ACA30420.1	ARO:3002036	CMY-25	0.0150081	0.108804	1
BAF56185.1	ARO:3002037	CMY-26	0.101955	0.286284	1
ABQ51091.1	ARO:3002039	CMY-28	0.0252233	0.149767	1
ABS12248.1	ARO:3002040	CMY-29	0.0291613	0.165332	1
ABS12249.1	ARO:3002041	CMY-30	0.167779	0.32269	1
ABR18736.1	ARO:3002042	CMY-31	0.333442	0.378094	1
ABN51006.1	ARO:3002045	CMY-34	0.0963906	0.275887	1
ABN51007.1	ARO:3002046	CMY-35	0.167779	0.32269	1
ABY58049.1	ARO:3002047	CMY-36	0.167718	0.32269	1
BAF36388.1	ARO:3002048	CMY-37	0.167718	0.32269	1
BAF95726.1	ARO:3002050	CMY-39	0.333442	0.378094	1
CAA75402.1	ARO:3002015	CMY-4	0.0884335	0.258559	1
ACA30422.1	ARO:3002051	CMY-40	0.167779	0.32269	1
BAG14343.1	ARO:3002052	CMY-41	0.0472479	0.21848	1
ADM21467.1	ARO:3002053	CMY-42	0.0884025	0.258559	1
ACJ65711.1	ARO:3002055	CMY-44	0.333442	0.378094	1
CBH19182.1	ARO:3002057	CMY-46	0.0133897	0.100559	1
ADH82410.1	ARO:3002058	CMY-47	0.00354114	0.0373679	1
ADP02979.1	ARO:3002059	CMY-48	0.00377042	0.0378202	1
ACV32310.1	ARO:3002060	CMY-49	0.167779	0.32269	1
YP_009075895.1	ARO:3002016	CMY-5	0.167779	0.32269	1
CBI75447.1	ARO:3002061	CMY-50	0.0430348	0.21848	1
AFK73431.1	ARO:3002062	CMY-51	0.167779	0.32269	1
ADQ38362.1	ARO:3002064	CMY-53	0.167718	0.32269	1
ADK55604.1	ARO:3002065	CMY-54	0.333442	0.378094	1
ADK55605.1	ARO:3002066	CMY-55	0.0252321	0.149767	1
ADP37961.1	ARO:3002068	CMY-57	0.333442	0.378094	1
BAJ17544.1	ARO:3002069	CMY-59	0.0884335	0.258559	1
CAB36902.1	ARO:3002017	CMY-6	0.333442	0.378094	1
AEM97672.1	ARO:3002073	CMY-60	0.333442	0.378094	1
AEM97673.1	ARO:3002074	CMY-61	0.167779	0.32269	1
AEM97674.1	ARO:3002075	CMY-62	0.333442	0.378094	1
AET07387.1	ARO:3002076	CMY-63	0.00799155	0.0635426	1
ADW84690.1	ARO:3002077	CMY-64	0.0884025	0.258559	1
AEI52842.1	ARO:3002078	CMY-65	0.0884335	0.258559	1
AEZ49849.1	ARO:3002079	CMY-66	0.167718	0.32269	1
AFK08541.1	ARO:3002080	CMY-67	0.0472479	0.21848	1
AEZ49855.1	ARO:3002081	CMY-68	0.00365311	0.0373679	1
CAB36900.1	ARO:3002018	CMY-7	0.167779	0.32269	1
AFU25635.1	ARO:3002083	CMY-70	0.333442	0.378094	1
AFK08538.1	ARO:3002084	CMY-71	0.167779	0.32269	1
AFU25641.1	ARO:3002085	CMY-72	0.167718	0.32269	1
ACU00152.1	ARO:3002086	CMY-73	0.0883094	0.258559	1
AFU25632.1	ARO:3002087	CMY-74	0.00737119	0.0616156	1
AFK73434.1	ARO:3002088	CMY-75	0.0884335	0.258559	1
AFK73437.1	ARO:3002089	CMY-76	0.00759815	0.0619249	1
AFU25644.1	ARO:3002090	CMY-77	0.333442	0.378094	1
AFK73443.1	ARO:3002091	CMY-78	0.0472315	0.21848	1
AFK73446.1	ARO:3002092	CMY-79	0.0252586	0.149767	1
AFK73449.1	ARO:3002093	CMY-80	0.167779	0.32269	1
AFK73452.1	ARO:3002094	CMY-81	0.00537203	0.0500366	1
AHL39324.1	ARO:3002095	CMY-82	0.0884335	0.258559	1
AFU25638.1	ARO:3002096	CMY-83	0.0884335	0.258559	1
AFK73455.1	ARO:3002097	CMY-84	0.570061	0.623665	1
AHL39322.1	ARO:3002098	CMY-85	0.0884335	0.258559	1
AHL39327.1	ARO:3002099	CMY-86	0.0472315	0.21848	1
BAL63057.1	ARO:3002100	CMY-87	0.0884335	0.258559	1
CCK86743.1	ARO:3002103	CMY-90	0.00759616	0.0619249	1
AHM76768.1	ARO:3002106	CMY-93	0.00366802	0.0373679	1
AGC54798.1	ARO:3002107	CMY-94	0.167779	0.32269	1
AGC54799.1	ARO:3002108	CMY-95	0.0884335	0.258559	1
AGH70380.1	ARO:3002111	CMY-98	0.0472479	0.21848	1
AGU59995.1	ARO:3002070	CMY-99	0.167718	0.32269	1
CAC19929.1	ARO:3002854	dfrA1	0.333442	0.378094	1
ACI32877.1	ARO:3002859	dfrA14	0.301179	0.378094	1
AAK60186.1	ARO:3003014	dfrA16	0.333442	0.378094	1
ABG91835.1	ARO:3002860	dfrA17	0.981026	0.985561	1
AAO04716.1	ARO:3002865	dfrC	0.12286	0.32269	1
AAD01867.1	ARO:3002875	dfrE	0.0371644	0.201926	1
AAD01868.1	ARO:3002867	dfrF	0.690612	0.730972	1
BAE15963.1	ARO:3002868	dfrG	0.690612	0.730972	1
BAG75524.1	ARO:3003954	efmA	0.945454	0.967718	1
CDO61513.1	ARO:3003948	efrA	0.207174	0.378094	1
CDO61516.1	ARO:3003949	efrB	0.0403779	0.217574	1
BAC11911.1	ARO:3003551	emeA	0.0606903	0.258559	1
BAA11236.1	ARO:3000206	emrK	0.0552857	0.248595	1
BAA11237.1	ARO:3000254	emrY	0.0483341	0.221929	1
NP_899170.1	ARO:3000599	Erm(33)	0.333442	0.378094	1
AAK07612.1	ARO:3000604	Erm(35)	0.333442	0.378094	1
YP_001315192.1	ARO:3000347	ErmA	0.319706	0.378094	1
AAF86219.1	ARO:3000375	ErmB	0.0829864	0.258559	1
AAA98296.1	ARO:3000250	ErmC	0.486014	0.545406	1
AAA88675.1	ARO:3000498	ErmF	0.0325737	0.179984	1
AAC37034.1	ARO:3000522	ErmG	0.632404	0.679287	1
AAC36915.1	ARO:3000593	ErmQ	0.943122	0.967718	1
AAA98096.1	ARO:3000595	ErmT	0.167779	0.32269	1
AAG03357.1	ARO:3000596	ErmX	0.476677	0.53585	1
CAA77936.1	ARO:3004039	Escherichia coli emrE	0.414711	0.468616	1
NP_311275.1	ARO:3000832	evgA	0.0595741	0.258559	1
AAC75429.1	ARO:3000833	evgS	0.0321548	0.179187	1
NP_273368.1	ARO:3003962	farB	0.17937	0.336925	1
ACC85616.1	ARO:3002804	FosA2	0.745907	0.784421	1
AEG78825.1	ARO:3002872	FosA3	0.0436767	0.21848	1
AJE60855.1	ARO:3003209	FosA5	0.00558904	0.0508267	1
WP_069174570.1	ARO:3004111	FosA6	0.0246433	0.149767	1
KKE03230.1	ARO:3004113	FosA7	0.333442	0.378094	1
AAL12234.1	ARO:3003552	fusB	0.665702	0.710373	1
ANK04027.1	ARO:3003838	gadW	0.0853012	0.258559	1
YP_491919.1	ARO:3000508	gadX	0.0793968	0.258559	1
WP_014550864.1	ARO:3003953	hmrM	0.0134182	0.100559	1
CAA55007.1	ARO:3001857	LAT-1	0.0471822	0.21848	1
CAA28198.1	ARO:3002454	LEN-1	0.570098	0.623665	1
CAG25830.1	ARO:3002460	LEN-10	0.570098	0.623665	1
CAG25828.1	ARO:3002461	LEN-11	0.570098	0.623665	1
CAG25817.1	ARO:3002462	LEN-12	0.570098	0.623665	1
CAG25814.1	ARO:3002463	LEN-13	0.570061	0.623665	1
AAP93847.1	ARO:3002477	LEN-14	0.583433	0.635056	1
AAL50725.1	ARO:3002478	LEN-15	0.167779	0.32269	1
AAU89706.1	ARO:3002464	LEN-16	0.570098	0.623665	1
CAP12346.2	ARO:3002465	LEN-18	0.0884335	0.258559	1
CAP12347.2	ARO:3002466	LEN-19	0.312908	0.378094	1
AAK69830.1	ARO:3002455	LEN-2	0.167779	0.32269	1
CAP12348.2	ARO:3002467	LEN-20	0.0884335	0.258559	1
CAP12349.2	ARO:3002468	LEN-21	0.167779	0.32269	1
CAP12350.2	ARO:3002469	LEN-22	0.333442	0.378094	1
CAP12351.2	ARO:3002470	LEN-23	0.570098	0.623665	1
CAP12352.2	ARO:3002471	LEN-24	0.570098	0.623665	1
WP_025712239	ARO:3002474	LEN-26	0.167779	0.32269	1
AAN05030.1	ARO:3002475	LEN-3	0.167779	0.32269	1
AAN05031.1	ARO:3002472	LEN-4	0.167779	0.32269	1
AAU25807.1	ARO:3002456	LEN-5	0.570098	0.623665	1
AAP93848.1	ARO:3002476	LEN-6	0.167779	0.32269	1
CAG25836.1	ARO:3002457	LEN-7	0.570098	0.623665	1
CAG25835.1	ARO:3002458	LEN-8	0.167779	0.32269	1
CAG25834.1	ARO:3002459	LEN-9	0.570098	0.623665	1
AAA26652.1	ARO:3000272	linA	0.251807	0.378094	1
ABF66011.1	ARO:3002881	lmrC	0.800681	0.836828	1
ABF66027.1	ARO:3002882	lmrD	0.301179	0.378094	1
ABF33001.1	ARO:3003969	lmrP	0.333442	0.378094	1
CAL44992.1	ARO:3002835	lnuA	0.526962	0.590342	1
AGI42804.1	ARO:3002836	lnuB	0.333442	0.378094	1
AAY32951.1	ARO:3002837	lnuC	0.0884335	0.258559	1
AAT46077.1	ARO:3000300	lsaA	0.0704016	0.258559	1
AEA37904.1	ARO:3003112	lsaC	0.0770617	0.258559	1
AFU35065.1	ARO:3003206	lsaE	0.333442	0.378094	1
AAV85981.1	ARO:3000533	macA	0.624401	0.672945	1
NP_459346.1	ARO:3000790	mdsB	0.167779	0.32269	1
BAE77781.1	ARO:3000795	mdtE	0.00953657	0.0749138	1
AAC77293.1	ARO:3001214	mdtM	0.0289896	0.165332	1
BAE78083.1	ARO:3003549	mdtO	0.00561276	0.0508267	1
BAE78082.1	ARO:3003550	mdtP	0.00202718	0.0227883	1
AGC51118.1	ARO:3000617	mecA	0.654427	0.699486	1
NP_373280.1	ARO:3000124	mecI	0.0197943	0.136008	1
YP_001245420.1	ARO:3000215	mecR1	0.594365	0.645876	1
YP_008997285.1	ARO:3000615	mefA	0.182761	0.341434	1
NP_358565.1	ARO:3000614	mefE	0.570098	0.623665	1
YP_002743273.1	ARO:3000616	mel	0.19012	0.354167	1
AAU95768.1	ARO:3000026	mepA	0.0461366	0.21848	1
YP_001440920.1	ARO:3000746	mepR	0.0872764	0.258559	1
NP_249116.1	ARO:3000377	MexA	0.301179	0.378094	1
NP_252896.1	ARO:3000808	mexI	0.167779	0.32269	1
AAG07064.1	ARO:3003693	mexK	0.167779	0.32269	1
BAE06008.1	ARO:3003699	mexQ	0.0884335	0.258559	1
AAG07762.1	ARO:3003030	mexV	0.333442	0.378094	1
YP_003281576.1	ARO:3000815	mgrA	0.018941	0.132791	1
AIT76115.1	ARO:3002178	MIR-13	0.301179	0.378094	1
AIT76114.1	ARO:3002181	MIR-16	0.301179	0.378094	1
CEA29752.1	ARO:3003173	MIR-17	0.301179	0.378094	1
AAO42602.1	ARO:3002168	MIR-2	0.333442	0.378094	1
AAU95779.1	ARO:3002169	MIR-3	0.943122	0.967718	1
ABN69112.2	ARO:3002167	MIR-4	0.301179	0.378094	1
AJO16037.1	ARO:3002170	MIR-5	0.301179	0.378094	1
ACJ05687.1	ARO:3002173	MIR-8	0.301179	0.378094	1
BAA03776.1	ARO:3000316	mphA	0.140345	0.32269	1
CAJ51085.1	ARO:3000319	mphC	0.00608947	0.0536531	1
AAS13767.1	ARO:3003839	Mrx	0.140345	0.32269	1
AAK01167.1	ARO:3002819	msrC	0.198133	0.368042	1
CCP46065.1	ARO:3000816	mtrA	0.0884025	0.258559	1
NP_274719.1	ARO:3000810	mtrC	0.583433	0.635056	1
NP_274718.1	ARO:3000811	mtrD	0.0252321	0.149767	1
CAA64891.1	ARO:3000812	mtrE	0.333442	0.378094	1
YP_002002225.1	ARO:3000817	mtrR	0.333442	0.378094	1
NP_251217.1	ARO:3004074	MuxB	0.0884025	0.258559	1
NP_251216.1	ARO:3004075	MuxC	0.0137041	0.101535	1
AAS68233.1	ARO:3000391	norA	0.0131774	0.100559	1
CCQ22388.1	ARO:3000421	norB	0.986353	0.989388	1
CAG25812.2	ARO:3002418	OKP-A-1	0.333442	0.378094	1
CAJ19608.1	ARO:3002427	OKP-A-10	0.333442	0.378094	1
CAP12353.2	ARO:3002428	OKP-A-11	0.333442	0.378094	1
CAP12354.2	ARO:3002429	OKP-A-12	0.167779	0.32269	1
ACL68096.1	ARO:3002430	OKP-A-13	0.333442	0.378094	1
ACL68095.1	ARO:3002431	OKP-A-14	0.333442	0.378094	1
ACN65419.1	ARO:3002432	OKP-A-15	0.167779	0.32269	1
ACN65418.1	ARO:3002433	OKP-A-16	0.333442	0.378094	1
CAG25815.2	ARO:3002419	OKP-A-2	0.333442	0.378094	1
CAJ19599.1	ARO:3002420	OKP-A-3	0.333442	0.378094	1
CAJ19601.1	ARO:3002421	OKP-A-4	0.333442	0.378094	1
CAJ19602.1	ARO:3002422	OKP-A-5	0.333442	0.378094	1
CAJ19603.1	ARO:3002423	OKP-A-6	0.333442	0.378094	1
CAJ19605.1	ARO:3002424	OKP-A-7	0.333442	0.378094	1
CAJ19606.1	ARO:3002425	OKP-A-8	0.333442	0.378094	1
CAJ19607.1	ARO:3002426	OKP-A-9	0.167779	0.32269	1
CAG25813.2	ARO:3002434	OKP-B-1	0.333442	0.378094	1
CAJ19619.1	ARO:3002443	OKP-B-10	0.333442	0.378094	1
CAJ19620.1	ARO:3002444	OKP-B-11	0.333442	0.378094	1
CAG25831.1	ARO:3002445	OKP-B-12	0.167779	0.32269	1
AAV80715.1	ARO:3002446	OKP-B-13	0.167779	0.32269	1
CAP12357.2	ARO:3002450	OKP-B-17	0.167779	0.32269	1
CAP12358.1	ARO:3002451	OKP-B-18	0.167779	0.32269	1
CAP12359.2	ARO:3002452	OKP-B-19	0.167779	0.32269	1
CAJ19610.1	ARO:3002435	OKP-B-2	0.167779	0.32269	1
CAP12360.2	ARO:3002453	OKP-B-20	0.167779	0.32269	1
CAJ19611.1	ARO:3002436	OKP-B-3	0.167779	0.32269	1
CAJ19612.1	ARO:3002437	OKP-B-4	0.167779	0.32269	1
CAP12356.2	ARO:3002438	OKP-B-5	0.167779	0.32269	1
CAP12355.2	ARO:3002439	OKP-B-6	0.167779	0.32269	1
CAJ19615.1	ARO:3002440	OKP-B-7	0.333442	0.378094	1
CAJ19616.1	ARO:3002441	OKP-B-8	0.333442	0.378094	1
CAJ19618.1	ARO:3002442	OKP-B-9	0.167779	0.32269	1
BAE06009.1	ARO:3003700	opmE	0.333442	0.378094	1
AAB41958.1	ARO:3000802	OprJ	0.333442	0.378094	1
NP_249118.1	ARO:3000379	OprM	0.333442	0.378094	1
YP_001693237.1	ARO:3003922	oqxA	0.288832	0.378094	1
YP_001693238	ARO:3003923	oqxB	0.179831	0.336925	1
AGW16407.1	ARO:3001513	OXA-325	0.333442	0.378094	1
AGZ83154.1	ARO:3001545	OXA-358	0.333442	0.378094	1
AIZ00987.1	ARO:3003117	OXA-421	0.333442	0.378094	1
AAQ08905.1	ARO:3001808	OXA-60	0.301179	0.378094	1
CAA82916.1	ARO:3002389	OXY-1-1	0.16968	0.325387	1
CAI43413.1	ARO:3002390	OXY-1-2	0.153557	0.32269	1
AAL78275.1	ARO:3002391	OXY-1-3	0.149965	0.32269	1
AAL78276.1	ARO:3002392	OXY-1-4	0.153476	0.32269	1
CAB42615.1	ARO:3002394	OXY-1-6	0.17937	0.336925	1
AAL78281.2	ARO:3002398	OXY-2-3	0.333442	0.378094	1
CAG34107.1	ARO:3002400	OXY-2-5	0.333442	0.378094	1
AAL78278.2	ARO:3002401	OXY-2-6	0.333442	0.378094	1
CAA88908.1	ARO:3002402	OXY-2-7	0.333442	0.378094	1
AAL17873.1	ARO:3002403	OXY-2-8	0.333442	0.378094	1
ACV44455.1	ARO:3002404	OXY-2-9	0.333442	0.378094	1
AAN28732.1	ARO:3002409	OXY-3-1	0.333442	0.378094	1
AAL78161.1	ARO:3002410	OXY-4-1	0.10529	0.293373	1
CAI43417.1	ARO:3002411	OXY-5-1	0.0993401	0.280388	1
CAI43419.1	ARO:3002412	OXY-5-2	0.0613728	0.258559	1
CAI43422.1	ARO:3002413	OXY-6-1	0.24841	0.378094	1
CAI43423.1	ARO:3002414	OXY-6-2	0.237701	0.378094	1
CAI43424.1	ARO:3002415	OXY-6-3	0.108415	0.300795	1
CAI43425.1	ARO:3002416	OXY-6-4	0.143005	0.32269	1
NP_358969.1	ARO:3000025	patB	0.121714	0.32269	1
YP_001569085.1	ARO:3000621	PC1 beta-lactamase (blaZ)	0.00465998	0.0440334	1
NP_358469.1	ARO:3000822	pmrA	0.0200257	0.136008	1
BAJ09383.1	ARO:3003046	qacA	0.423437	0.476824	1
AAQ10694.1	ARO:3003047	qacB	0.725564	0.765481	1
ABG56269.1	ARO:3002724	QnrB10	0.167779	0.32269	1
CAO82104.1	ARO:3002726	QnrB12	0.333442	0.378094	1
ABX72044.1	ARO:3002728	QnrB14	0.167779	0.32269	1
ABX72227.1	ARO:3002730	QnrB15	0.333442	0.378094	1
ABV66096.1	ARO:3002731	QnrB16	0.333442	0.378094	1
CAP45902.1	ARO:3002732	QnrB17	0.167779	0.32269	1
AGK90303.1	ARO:3002734	QnrB19	0.0884335	0.258559	1
ABO93588.1	ARO:3002715	QnrB2	0.167779	0.32269	1
BAG55487.1	ARO:3002735	QnrB20	0.333442	0.378094	1
ACM50952.1	ARO:3002736	QnrB21	0.333442	0.378094	1
ACS71747.1	ARO:3002738	QnrB23	0.167779	0.32269	1
ADN94685.1	ARO:3002740	QnrB25	0.333442	0.378094	1
AEH59666.1	ARO:3002741	QnrB26	0.333442	0.378094	1
ADM52186.1	ARO:3002742	QnrB27	0.0884335	0.258559	1
ADM52188.1	ARO:3002743	QnrB28	0.333442	0.378094	1
ADM52193.1	ARO:3002744	QnrB29	0.333442	0.378094	1
ABC17629.1	ARO:3002716	QnrB3	0.333442	0.378094	1
ADQ43424.1	ARO:3002746	QnrB31	0.167718	0.32269	1
AEL00450.1	ARO:3002747	QnrB32	0.0884335	0.258559	1
AEL00451.1	ARO:3002748	QnrB33	0.333442	0.378094	1
AEL00456.1	ARO:3002750	QnrB35	0.333442	0.378094	1
AEL00458.1	ARO:3002751	QnrB36	0.333442	0.378094	1
AEL00459.1	ARO:3002752	QnrB37	0.333442	0.378094	1
AEL00461.1	ARO:3002753	QnrB38	0.167779	0.32269	1
ABC17630.2	ARO:3002718	QnrB4	0.333442	0.378094	1
AEQ94272.1	ARO:3002757	QnrB42	0.0884025	0.258559	1
AFA52645.1	ARO:3002759	QnrB44	0.333442	0.378094	1
ADW54092.1	ARO:3002761	QnrB46	0.333442	0.378094	1
AFH88686.1	ARO:3002763	QnrB48	0.333442	0.378094	1
AFD54601.1	ARO:3002764	QnrB49	0.333442	0.378094	1
ABC17628.1	ARO:3002719	QnrB5	0.333442	0.378094	1
CCI51002.2	ARO:3002767	QnrB54	0.333442	0.378094	1
AHE41343.1	ARO:3002768	QnrB55	0.333442	0.378094	1
AFR46588.1	ARO:3002770	QnrB57	0.333442	0.378094	1
AFR46590.1	ARO:3002772	QnrB59	0.0884335	0.258559	1
ABP87778.1	ARO:3002720	QnrB6	0.167779	0.32269	1
BAN04743.1	ARO:3002773	QnrB60	0.333442	0.378094	1
BAN04737.1	ARO:3002774	QnrB61	0.0884025	0.258559	1
AGL43625.1	ARO:3002776	QnrB64	0.167779	0.32269	1
AGL43626.1	ARO:3002777	QnrB65	0.333442	0.378094	1
AGL43630.1	ARO:3002781	QnrB69	0.333442	0.378094	1
AGN92479.1	ARO:3002784	QnrB72	0.0884335	0.258559	1
AGT59159.1	ARO:3002785	QnrB73	0.333442	0.378094	1
ABW03157.2	ARO:3002722	QnrB8	0.167779	0.32269	1
AFK13828.1	ARO:3000823	ramA	0.0212276	0.142685	1
ADV91011.1	ARO:3000245	RbpA	0.167779	0.32269	1
AJD73064.1	ARO:3001301	RlmA(II)	0.0152695	0.109403	1
BAD95494.1	ARO:3002895	SAT-1	0.333442	0.378094	1
AAB53445.1	ARO:3002897	SAT-4	0.9443	0.967718	1
YP_186749.1	ARO:3000489	sav1866	0.00355779	0.0373679	1
AEI83429.1	ARO:3001168	SHV-121	0.301179	0.378094	1
AEI83430.1	ARO:3001181	SHV-137	0.333442	0.378094	1
AFQ23968.1	ARO:3001201	SHV-162	0.333442	0.378094	1
AHA80963.1	ARO:3001361	SHV-178	0.333442	0.378094	1
AAF37209.2	ARO:3001083	SHV-25	0.301179	0.378094	1
WP_063864673.1	ARO:3001062	SHV-3	0.301179	0.378094	1
AAP41108.1	ARO:3001107	SHV-50	0.301179	0.378094	1
AAT01223.1	ARO:3001110	SHV-53	0.333442	0.378094	1
AAD51344.1	ARO:3003051	smeA	0.333442	0.378094	1
AAD51346.1	ARO:3003053	smeC	0.333442	0.378094	1
CAC14594.1	ARO:3003055	smeD	0.333442	0.378094	1
CAC14595.1	ARO:3003056	smeE	0.015019	0.108804	1
CAC14596.1	ARO:3003057	smeF	0.333442	0.378094	1
AAD51348.1	ARO:3003066	smeR	0.333442	0.378094	1
AAD51347.1	ARO:3003067	smeS	0.333442	0.378094	1
BAA23130.1	ARO:3002493	SRT-1	0.167779	0.32269	1
AAS07017.3	ARO:3002494	SRT-2	0.167779	0.32269	1
Q8DWT2	ARO:3003774	Streptococcus agalactiae mprF	0.167779	0.32269	1
CAA67349.1	ARO:3003359	Streptomyces cinnamoneus EF-Tu mutants conferring resistance to elfamycin	0.239563	0.378094	1
AAO47226.2	ARO:3003318	Streptomyces rishiriensis parY mutant conferring resistance to aminocoumarin	0.369465	0.418213	1
AEJ33969.1	ARO:3000410	sul1	0.80089	0.836828	1
AAL59753.1	ARO:3000412	sul2	0.745922	0.784421	1
APB03219.1	ARO:3003986	TaeA	0.333442	0.378094	1
CAD09800.1	ARO:3000873	TEM-1	0.0884025	0.258559	1
AAM18924.1	ARO:3000964	TEM-101	0.167779	0.32269	1
AAK82652.1	ARO:3000965	TEM-102	0.583433	0.635056	1
AAM61952.1	ARO:3000967	TEM-104	0.0884335	0.258559	1
AAM61953.1	ARO:3000968	TEM-105	0.333442	0.378094	1
AAM52207.1	ARO:3000969	TEM-106	0.333442	0.378094	1
AAM28884.1	ARO:3000971	TEM-108	0.333442	0.378094	1
AAT46413.1	ARO:3000972	TEM-109	0.0884025	0.258559	1
AAW66604.1	ARO:3000883	TEM-11	0.333442	0.378094	1
AAL68923.1	ARO:3000973	TEM-110	0.167718	0.32269	1
AAS89982.1	ARO:3000975	TEM-112	0.167718	0.32269	1
AAS89983.1	ARO:3000976	TEM-113	0.0884025	0.258559	1
AAS89984.1	ARO:3000977	TEM-114	0.312872	0.378094	1
AAN04881.1	ARO:3000978	TEM-115	0.0884335	0.258559	1
NP_052129.1	ARO:3000979	TEM-116	0.0884335	0.258559	1
AAN05026.1	ARO:3000980	TEM-117	0.167718	0.32269	1
AAN05029.1	ARO:3000981	TEM-118	0.333442	0.378094	1
AAQ01671.1	ARO:3000983	TEM-121	0.0472315	0.21848	1
AAQ98890.1	ARO:3000984	TEM-122	0.0884335	0.258559	1
AAQ93490.1	ARO:3000985	TEM-123	0.333442	0.378094	1
AAQ93491.1	ARO:3000986	TEM-124	0.333442	0.378094	1
AAT46414.1	ARO:3000987	TEM-125	0.333442	0.378094	1
AAT45742.1	ARO:3000988	TEM-126	0.096476	0.275887	1
AAR89358.1	ARO:3000989	TEM-127	0.0252586	0.149767	1
AAR89359.1	ARO:3000990	TEM-128	0.0884335	0.258559	1
CAG34105.1	ARO:3000993	TEM-129	0.0526435	0.238358	1
CAI29263.1	ARO:3000994	TEM-130	0.0884335	0.258559	1
AAR84298.1	ARO:3000996	TEM-132	0.301179	0.378094	1
CAG25427.1	ARO:3000999	TEM-135	0.0964076	0.275887	1
AAV83795.1	ARO:3001000	TEM-136	0.0884025	0.258559	1
AAW47922.1	ARO:3001002	TEM-138	0.0884025	0.258559	1
AAX56615.1	ARO:3001004	TEM-141	0.1745	0.331703	1
ABD60314.1	ARO:3001005	TEM-142	0.0884335	0.258559	1
AAY85632.1	ARO:3001006	TEM-143	0.05775	0.254659	1
AAZ14083.2	ARO:3001012	TEM-145	0.0884025	0.258559	1
AAZ14084.2	ARO:3001013	TEM-146	0.167779	0.32269	1
ABB84515.1	ARO:3001014	TEM-147	0.333442	0.378094	1
CAJ32372.1	ARO:3001015	TEM-148	0.642329	0.687682	1
ABC96711.1	ARO:3001016	TEM-149	0.142942	0.32269	1
CAO98721.1	ARO:3000886	TEM-15	0.167779	0.32269	1
CAJ66089.1	ARO:3001017	TEM-150	0.32945	0.378094	1
ABI74448.1	ARO:3001018	TEM-151	0.0252675	0.149767	1
ABI74447.1	ARO:3001019	TEM-152	0.333442	0.378094	1
ABG77582.1	ARO:3001021	TEM-155	0.333442	0.378094	1
CAQ00120.1	ARO:3001022	TEM-156	0.333442	0.378094	1
ABI81768.1	ARO:3001023	TEM-157	0.0993227	0.280388	1
ABQ00181.1	ARO:3001024	TEM-158	0.321108	0.378094	1
ABM54869.1	ARO:3001025	TEM-159	0.333442	0.378094	1
CAA46346.1	ARO:3000887	TEM-16	0.167718	0.32269	1
ABM54870.1	ARO:3001026	TEM-160	0.0884335	0.258559	1
ABO64442.1	ARO:3001028	TEM-162	0.333442	0.378094	1
ACF32746.1	ARO:3001029	TEM-163	0.632384	0.679287	1
ABX71157.1	ARO:3001030	TEM-164	0.0472315	0.21848	1
ACI25375.1	ARO:3001032	TEM-166	0.0472479	0.21848	1
ACJ04051.1	ARO:3001033	TEM-167	0.0884335	0.258559	1
ACR22829.1	ARO:3001034	TEM-168	0.0964076	0.275887	1
ACP18864.1	ARO:3001035	TEM-169	0.167718	0.32269	1
CAA74912.2	ARO:3000888	TEM-17	0.167779	0.32269	1
ADA79630.1	ARO:3001037	TEM-171	0.321144	0.378094	1
ADB90239.1	ARO:3001041	TEM-176	0.0472479	0.21848	1
CAA65888.1	ARO:3001043	TEM-178	0.329594	0.378094	1
ADP20705.1	ARO:3001373	TEM-182	0.0884335	0.258559	1
ADR71220.1	ARO:3001045	TEM-183	0.333442	0.378094	1
CCA61905.1	ARO:3001375	TEM-184	0.179475	0.336925	1
AEG64812.1	ARO:3001374	TEM-185	0.0472315	0.21848	1
AET99222.1	ARO:3001046	TEM-186	0.333442	0.378094	1
AEL17198.1	ARO:3001048	TEM-188	0.333442	0.378094	1
AFN21551.1	ARO:3000890	TEM-19	0.0884335	0.258559	1
AEL88240.1	ARO:3001050	TEM-190	0.167718	0.32269	1
AEQ59621.1	ARO:3001051	TEM-191	0.333442	0.378094	1
AEQ59620.1	ARO:3001052	TEM-192	0.333442	0.378094	1
AFC75523.1	ARO:3001053	TEM-193	0.167779	0.32269	1
AFC75524.1	ARO:3001054	TEM-194	0.0884335	0.258559	1
AFC75525.1	ARO:3001055	TEM-195	0.167779	0.32269	1
AFE48832.1	ARO:3001376	TEM-196	0.167779	0.32269	1
AEK48085.1	ARO:3001056	TEM-197	0.312908	0.378094	1
BAL68178.1	ARO:3001057	TEM-198	0.0884335	0.258559	1
AFN69127.1	ARO:3001058	TEM-199	0.1745	0.331703	1
CAA38429.1	ARO:3000874	TEM-2	0.333442	0.378094	1
AFS44742.1	ARO:3001378	TEM-201	0.099184	0.280388	1
AGK40892.1	ARO:3001384	TEM-207	0.0252321	0.149767	1
AGL39384.1	ARO:3001385	TEM-208	0.32945	0.378094	1
AGW25367.1	ARO:3001386	TEM-209	0.0884335	0.258559	1
AHA80960.1	ARO:3001388	TEM-211	0.0472479	0.21848	1
AJO16044.1	ARO:3001391	TEM-214	0.333442	0.378094	1
AJO16045.1	ARO:3001392	TEM-215	0.333442	0.378094	1
AHJ78622.1	ARO:3001393	TEM-216	0.0884025	0.258559	1
AIS39742.1	ARO:3003157	TEM-219	0.160836	0.32269	1
CAA76795.1	ARO:3000893	TEM-22	0.312908	0.378094	1
CAA45828.1	ARO:3000875	TEM-3	0.0884025	0.258559	1
CAD24670.1	ARO:3000900	TEM-30	0.0884335	0.258559	1
AGE11905.1	ARO:3000904	TEM-34	0.333442	0.378094	1
WP_063864911.1	ARO:3000876	TEM-4	0.0884335	0.258559	1
CBX53726.1	ARO:3000910	TEM-40	0.0472315	0.21848	1
CAA66659.1	ARO:3000911	TEM-42	0.32945	0.378094	1
AAC32889.2	ARO:3000912	TEM-43	0.0884335	0.258559	1
CAA64682.1	ARO:3000914	TEM-45	0.102307	0.286284	1
CAA71322.1	ARO:3000916	TEM-47	0.0252586	0.149767	1
CAA71323.1	ARO:3000917	TEM-48	0.0884025	0.258559	1
CAA71324.1	ARO:3000918	TEM-49	0.0884335	0.258559	1
CAA73933.1	ARO:3000921	TEM-52	0.333442	0.378094	1
AAD22538.1	ARO:3000922	TEM-53	0.0252675	0.149767	1
AAD22539.1	ARO:3000923	TEM-54	0.1745	0.331703	1
ABB97007.1	ARO:3000924	TEM-55	0.0252586	0.149767	1
ACJ43254.1	ARO:3000926	TEM-57	0.167779	0.32269	1
AAC05975.1	ARO:3000929	TEM-60	0.167779	0.32269	1
AAD33116.2	ARO:3000934	TEM-67	0.167718	0.32269	1
CAB92324.1	ARO:3000935	TEM-68	0.321144	0.378094	1
AAO33760.1	ARO:3000879	TEM-7	0.167779	0.32269	1
AAF01046.1	ARO:3000936	TEM-70	0.0472315	0.21848	1
AAL03985.1	ARO:3000937	TEM-71	0.333442	0.378094	1
CAB65358.1	ARO:3000939	TEM-73	0.333442	0.378094	1
CAB65358.1	ARO:3000943	TEM-77	0.0884025	0.258559	1
AAF05611.1	ARO:3000946	TEM-79	0.167718	0.32269	1
AAL29433.1	ARO:3000948	TEM-81	0.0884025	0.258559	1
AAL29434.1	ARO:3000949	TEM-82	0.167718	0.32269	1
AAL29435.1	ARO:3000950	TEM-83	0.167718	0.32269	1
AAL29436.1	ARO:3000951	TEM-84	0.333442	0.378094	1
CAC43229.1	ARO:3000952	TEM-85	0.167718	0.32269	1
AAG44570.1	ARO:3000954	TEM-87	0.0884335	0.258559	1
AAK71474.1	ARO:3000956	TEM-89	0.0472315	0.21848	1
AAK30619.1	ARO:3000957	TEM-90	0.0884025	0.258559	1
BAB16308.1	ARO:3000958	TEM-91	0.0884025	0.258559	1
AAF66653.1	ARO:3000959	TEM-92	0.333442	0.378094	1
CAC85660.1	ARO:3000960	TEM-93	0.227238	0.378094	1
CAC85661.1	ARO:3000961	TEM-94	0.0884335	0.258559	1
CAC67290.1	ARO:3000962	TEM-95	0.333442	0.378094	1
AAK37619.1	ARO:3000481	tet(35)	0.00366666	0.0373679	1
AAP93922.1	ARO:3000569	tet(41)	0.167779	0.32269	1
YP_007503840.1	ARO:3000165	tet(A)	0.418042	0.471563	1
BAC67143.1	ARO:3000166	tet(B)	0.176368	0.334279	1
AAO16462.1	ARO:3000167	tet(C)	0.329594	0.378094	1
CAE51745.1	ARO:3000168	tet(D)	1	1	1
YP_003283625.1	ARO:3000178	tet(K)	0.00792095	0.0635426	1
AAA22851.1	ARO:3000179	tet(L)	0.669054	0.712783	1
CAC41371.1	ARO:3000196	tet32	0.0198273	0.136008	1
CBH51823.1	ARO:3000556	tet44	0.00578716	0.0516881	1
AET10444.1	ARO:3004032	tetA(46)	0.939506	0.967718	1
AET10445.1	ARO:3004033	tetB(46)	0.639136	0.685389	1
AAA20117.1	ARO:3000195	tetB(P)	0.00188745	0.0215898	1
CAJ67339.1	ARO:3000186	tetM	0.0282718	0.163126	1
AAA23033.1	ARO:3000190	tetO	0.0273608	0.16016	1
CAA79727.1	ARO:3000191	tetQ	0.0318059	0.178771	1
AAA25293.1	ARO:3000192	tetS	0.0523337	0.238358	1
AAF01499.1	ARO:3000193	tetT	0.333442	0.378094	1
ACA23185.1	ARO:3000194	tetW	0.263251	0.378094	1
AAA27471.1	ARO:3000205	tetX	0.966004	0.982582	1
AHH83938.1	ARO:3000013	vanB	0.333442	0.378094	1
ABA71731.1	ARO:3002909	vanG	0.333442	0.378094	1
AAB05626.1	ARO:3002943	vanHB	0.333442	0.378094	1
AAA65953.1	ARO:3002919	vanRA	0.333442	0.378094	1
AAB05622.1	ARO:3002921	vanRB	0.333442	0.378094	1
AAM09851.1	ARO:3002923	vanRD	0.167779	0.32269	1
ABA71727.1	ARO:3002926	vanRG	0.0884335	0.258559	1
AEP40503.1	ARO:3002929	vanRN	0.333442	0.378094	1
AAB05623.1	ARO:3002932	vanSB	0.333442	0.378094	1
AAF86642.1	ARO:3002933	vanSC	0.333442	0.378094	1
AAO82019.1	ARO:3002916	vanV	0.333442	0.378094	1
AAB05625.1	ARO:3002964	vanWB	0.333442	0.378094	1
AAB05628.1	ARO:3002950	vanXB	0.333442	0.378094	1
AAB05624.1	ARO:3002956	vanYB	0.333442	0.378094	1
AGN33258.1	ARO:3002829	vgaA	0.61514	0.666231	1
ABH10964.1	ARO:3002830	vgaALC	0.116288	0.321271	1
AMP35312.1	ARO:3002831	vgaC	0.13553	0.32269	1
